# Supplementary material
Source: PubMed Central journal article supplement (PMC8111788)
Supplement: NIHMS1689942-supplement-Supple_Materials_Methods.pdf [file NIHMS1689942-supplement-Supple_Materials_Methods.pdf]

## Supplementary Materials and Methods

### Antibody

The primary antibodies used in this study were as following: anti-Kir2.1 (Cat.no.P6102, Sigma-Aldrich), anti-Ecadherin (Cat.no.3195, CST), anti-Vimentin (Cat.no.5741, CST), anti-Snail (Cat.no.3879, CST), anti-p-ERK1/2 (Cat.no.4370, CST), anti-ERK1/2 (Cat.no. 4695, CST), anti-p-JNK (Cat.no. 4668, CST), anti-JNK (Cat.no. 9252, CST), anti-p-P38 (Cat.no. 4511, CST), anti-P38 (Cat.no. 8690, CST), anti-p-MEK1/2 (Cat.no. 9154, CST), anti-MEK1/2 (Cat.no. 9122, CST), anti-p-A-Raf (Cat.no.4431, CST), anti-A-Raf (Cat.no.4432, CST), anti-p-B-Raf (Cat.no.2696, CST), anti-B-Raf (Cat.no.9433, CST), anti-p-C-Raf (Ser338, Cat.no.9427, CST), anti-p-C-Raf (Ser289/296/301, Cat.no.9431, CST), anti-p-C-Raf (Ser259, Cat.no.9421, CST), anti-C-Raf (Cat.no.12552, CST), anti-Flag (Cat.no.F1804, Sigma), anti-V5 (Cat.no. 13202, CST), anti-Stk38 (Cat.no.ab125131, Abcam), anti-Rock2 (Cat.no. ab125025, Abcam), anti-MEKK2 (Cat.no.ab33918, Abcam), anti-Smurf1 (Cat.no.ab117552, Abcam), anti-His (Cat.no. 12698, CST), anti-HA (Cat.no. 3724, CST) and anti- $\beta$ -actin (Cat.no. 3700, CST).
